# Supplementary material for: Genomic surveillance of multidrug-resistant Klebsiella in Wales reveals persistent spread of Klebsiella pneumoniae ST307 and adaptive evolution of pOXA-48-like plasmids
Source: PubMed Central journal article supplement (PMC10272877; doi:10.1099/mgen.0.001016), 2023-05-25
Supplement: mgen-9-1016-s003.pdf [file mgen-9-1016-s003.pdf]

## Supplementary Information

### Genomic surveillance of multidrug-resistant *Klebsiella* in Wales reveals persistent spread of *K. pneumoniae* ST307 and adaptive evolution of pOXA-48-like plasmids

Sophia David<sup>1</sup>, Massimo Mentasti<sup>2</sup>, Kirsty Sands<sup>3,4</sup>, Edward Portal<sup>4</sup>, Lee Graham<sup>5</sup>, Joanne Watkins<sup>5</sup>, Catie Williams<sup>5</sup>, Brendan Healy<sup>6</sup>, Owen B. Spiller<sup>4</sup>, David M. Aanensen<sup>1</sup>, Mandy Wootton<sup>2</sup> & Lim Jones<sup>2</sup>

**Supplementary Table 1.** Metadata, assembly statistics and genotyping results for 540 short-read sequenced *Klebsiella* isolates included in this study.  
[Provided in Excel spreadsheet]

**Supplementary Table 2.** Metadata and hybrid assembly statistics for 39 long-read sequenced *Klebsiella* isolates included in this study.  
[Provided in Excel spreadsheet]

**Supplementary Table 3.** URLs for interactive Microreact projects containing phylogenetic analyses for each *Klebsiella* species (those with  $\geq 5$  isolates only) together with all metadata and genotypic data.

| Species                   | Microreact URL                                                                                                                                                                |
|---------------------------|-------------------------------------------------------------------------------------------------------------------------------------------------------------------------------|
| <i>K. pneumoniae</i>      | <a href="https://microreact.org/project/aSJqpc9MZVZcurTWtoadW8-k-pneumoniae-phw-n421">https://microreact.org/project/aSJqpc9MZVZcurTWtoadW8-k-pneumoniae-phw-n421</a>         |
| <i>K. aerogenes</i>       | <a href="https://microreact.org/project/dsACmepLnijN2GKy9dr29s-k-aerogenes-phw-n33">https://microreact.org/project/dsACmepLnijN2GKy9dr29s-k-aerogenes-phw-n33</a>             |
| <i>K. michiganensis</i>   | <a href="https://microreact.org/project/8UDw4RarAEnVkMu4jDzCe5-k-michiganensis-phw-n27">https://microreact.org/project/8UDw4RarAEnVkMu4jDzCe5-k-michiganensis-phw-n27</a>     |
| <i>K. variicola</i>       | <a href="https://microreact.org/project/4Ctdt1YhyrPcei6cswD4iw-k-variicola-phw-n23">https://microreact.org/project/4Ctdt1YhyrPcei6cswD4iw-k-variicola-phw-n23</a>             |
| <i>K. oxytoca</i>         | <a href="https://microreact.org/project/f5w1sF46NFkExbHTLgDiNm-k-oxytoca-phw-n17">https://microreact.org/project/f5w1sF46NFkExbHTLgDiNm-k-oxytoca-phw-n17</a>                 |
| <i>K. quasipneumoniae</i> | <a href="https://microreact.org/project/aER2kfzsHKbin1ZWBvwU3y-k-quasipneumoniae-phw-n11">https://microreact.org/project/aER2kfzsHKbin1ZWBvwU3y-k-quasipneumoniae-phw-n11</a> |
| <i>K. grimontii</i>       | <a href="https://microreact.org/project/jfHhJfsHs244sxb6ZqNziA-k-grimontii-phw-n5">https://microreact.org/project/jfHhJfsHs244sxb6ZqNziA-k-grimontii-phw-n5</a>               |

**Supplementary Table 4.** Conjugation frequencies determined from mating cultures comprising ST307 donor isolates harbouring a *bla*<sub>OXA-48-like</sub>-encoding pOXA-48-like plasmid and a recipient *K. pneumoniae* or *E. coli* strain.  
[Provided in Excel spreadsheet]
